# Supplementary material
Source: publisher site journal article supplement (https://www.spandidos-publications.com/5672/downloadSupplementary)

Figure S1. Effects of PPT on the survival of human OSCC cell lines and human oral keratinocytes. (A) HSC3 and HSC4 cells were treated with DMSO or PPT for 48 and 72 h, and cell viability was examined using an automated cell counter (B) HSC3 and HSC4 OSCC cells, and IHOK human oral keratinocytes were treated with DMSO or PPT for 24 h, and the cell viability was examined using an automated cell counter. Data are presented as the mean  $\pm$  SD of three independent experiments. \* $P < 0.05$ . PPT, podophyllotoxin; OSCC, oral squamous cell carcinoma.

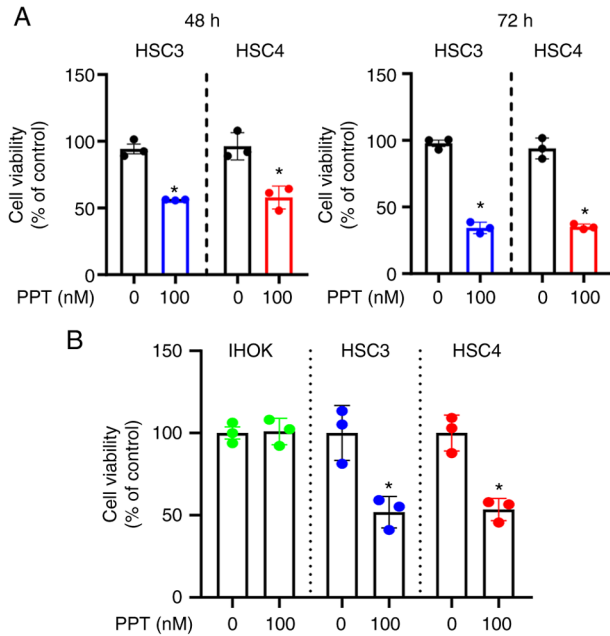

Figure S2. PPT-mediated apoptosis does not directly affect the levels of Bax and Bak proteins in HSC3 and HSC4 cells. Western blots showing the expression of Bax and Bak.  $\beta$ -actin was used as the internal control. Data are presented as the mean  $\pm$  SD of three independent experiments. PPT, podophyllotoxin.

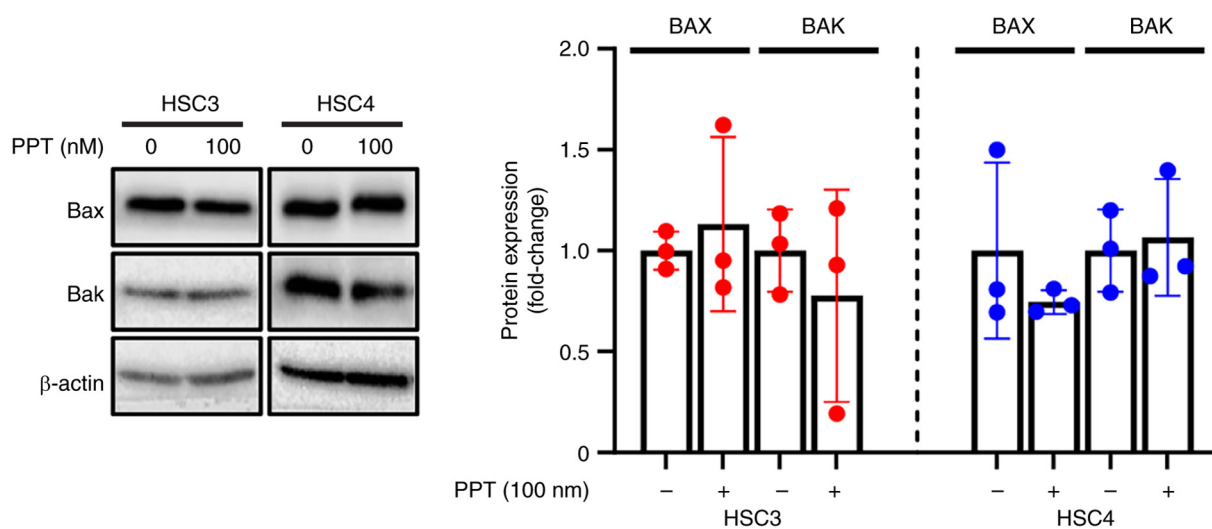

Supplement: Supplementary file 1 [file downloadSupplementary]
